# Supplementary material
Source: PubMed Central journal article supplement (PMC2919979)
Supplement: 0910943107_pnas.200910943SI.pdf [file 0910943107_pnas.200910943SI.pdf]

# Supporting Information

Jelenska et al. 10.1073/pnas.0910943107

## SI Materials and Methods

**Bacteria and Plants, Infections, and Heat Stress Conditions.** *Pseudomonas syringae* strains were described (1). Cytosolic *hsp70* mutants and overexpressing (line 8–7) *Arabidopsis Columbia* (Col) lines were from J. Parker (Max-Planck Institute, Cologne, Germany; refs. 2, 3) and Col *cpHsp70* lines from H.M. Li (Institute of Molecular Biology, Academia Sinica, Taipei, Taiwan; ref. 4). PVX *hsp70-1* silencing and vector control constructs were from R. Terauchi (Iwate Biotechnology Research Center, Iwate, Japan) and VIGS was performed as described (5), with 3-week-old *Nicotiana benthamiana* infected with PVX transcripts and *P. syringae* infiltration 18 d later. HA-tagged HopI<sub>Pma</sub> (JJ30) full-length and mutant versions and Agrobacterium-mediated plant transformation were described in refs. 1 and 6. Two Col and Nossen lines expressing Δrepeats (JJ196), QAA (JJ202), and ΔJ (JJ197) were used.

*Escherichia coli* and *P. syringae* pv. *maculicola* strain PmaES4326 and its derivatives were grown as in ref. 7. *Arabidopsis thaliana*, mustard family plants, and pea (*Pisum sativum*) were grown in a 16-h light/8-h dark cycle at 20 °C. *N. benthamiana* and tomato “Money maker,” “Bonnie Best,” and “76R” were grown in a 16-h light/8-h dark cycle at 24 °C.

For heat treatments, *Arabidopsis* plants were grown at 20 °C and (i) kept at 30 °C after infection, (ii) incubated for 35 min at 50 °C, allowed 2-h recovery before infection and kept at 20 °C after infection, (iii) preincubated 1 d at 30 °C before infection and kept at 30 °C after infection, and (iv) control plants grown and infected at 20 °C.

Nineteen- to 21-day-old *Arabidopsis* and 4-week-old other plants were inoculated by blunt syringe infiltration at OD<sub>600</sub> of 0.0003 or sprayed at OD<sub>600</sub> of 0.005 (unless stated otherwise) with 0.02% silwet (8). Six to eight independent samples were averaged for each genotype for the *P. syringae* growth experiments. Unless stated otherwise, leaf disk samples were taken 3 days after infiltration and 5 days after spray inoculation, and ground and serial dilutions plated for growth analysis (8). All infection experiments were repeated at least twice with similar results and are shown with SE. Student's *t* test was used for statistical analysis (with Statview software; SAS Institute).

**Chloroplast Isolation.** *Arabidopsis* chloroplasts were isolated as in ref. 9 with modification. Leaves (2.5–3 g) of 19-d *Arabidopsis* were ground at 4 °C by polytron in grinding buffer (50 mM Hepes/KOH at pH 7.8, 0.33 M sorbitol, 10 mM EDTA, 10 mM NaHCO<sub>3</sub>, 5 mM MgCl<sub>2</sub>, and 25 mM Na-ascorbate), filtered through Miracloth (Calbiochem), centrifuged for 5 min at 1200 × *g*, the pellet was washed with 20 mL of the same buffer and resuspended in 1 mL of lysis buffer (50 mM phosphate buffer at pH 8.0, 150 mM NaCl, protease inhibitor). This method yields 70–80% intact chloroplasts with minimal contamination with other cellular compartments (≈1%; ref. 9). Different fractions were analyzed by SDS/PAGE or blue-native PAGE and immunoblotting, or proteins were immunoprecipitated after adding igepal CA-630 to 0.2%.

Pea chloroplasts were isolated according to ref. 10.

**Recombinant Proteins.** HopI<sub>Psy</sub> (JJ120) and control HopX2<sub>Pma</sub> (JJ128) were cloned into His-tag expression vector pMCSG7 according to ref. 11. HPD in HopI<sub>Psy</sub> was mutagenized to QAA (JJ218) by PCR similarly as described for HopI<sub>Pma</sub> (1). J domain of HopI<sub>Pma</sub> (amino acids 334–432) was cloned into pET21, in frame with His-tag (JJ9). GST fusion clones of AtHsp70 cDNAs in pGEX-2T were from C. Guy (University of Florida, Gainesville, FL; ref. 12). GST vector was used as control. Purified Hlj1 (J domain-

GST; ref. 13) and human mHsp70 were gifts from J. Brodsky (University of Pittsburgh, Pittsburgh). AtHsp70-1 used for ATPase activity was cloned into pGEX-2 from pENTRD clone provided by L. Noël (Centre National de la Recherche Scientifique-Commissariat à l'Énergie Atomique, St. Paul-lez-Durance, France). All proteins were expressed in *E. coli* BL21 and purified on Ni-NTA agarose (Qiagen; His<sub>6</sub> fusions) or glutathione agarose (Amersham; GST fusions) according to manufacturer instructions, using Tris-NaCl buffers. Protein concentration was measured with Bio-Rad Bradford reagent and verified by SDS/PAGE.

**ATPase Activity of Hsp70.** Phosphate released by ATP hydrolysis was measured in colorimetric assay with molybdate and malachite green reagent following ref. 14. Reactions (25 μL) in 96-well plates contained 0.3 μM Hsp70 and 0.5 μM J protein (without GrpE), were started by adding ATP to final concentration 1 mM, and stopped after 1- or 2.5-h incubation at room temperature (14). Absorbance at 630 nm was measured in a plate reader. Phosphate standard curve was included in each experiment.

**Pull-Down Assays, Immunoprecipitation, and Protein Analysis.** For pull downs, recombinant proteins from *E. coli* lysates were immobilized on Ni-NTA or glutathione resins (by following purification protocol until elution), incubated for 1 h at 4 °C with *E. coli* lysate containing interacting partner or with plant or chloroplast extract, eluted, and analyzed by immunoblotting.

IP with anti-HA matrix (Roche) followed manufacturer's IP protocol. Plant tissue (0.5 g) (leaves of 19- to 21-d *Arabidopsis* or *N. benthamiana* 2 d after Agroinfiltration) was ground in liquid nitrogen and suspended in 1 mL of lysis buffer (as in chloroplast isolation) with 0.2% igepal. Extract (0.5 mL) was incubated for 2 h at 4 °C with 75 μL of HA-matrix (Roche), and manufacturer's IP protocol was followed. For HopI1 mutants with lower expression (QAA, ΔJ), 1 mL of extract was used, whereas HopI1 and Δrepeats extracts were diluted twice and 1 mL of diluted extract was used. After IP proteins were separated by SDS/PAGE and analyzed either by Coomassie blue staining and LC-MS/MS or by immunoblotting. In all immunoblotting experiments, membranes were subsequently stained with Coomassie blue to control for loading by using standard procedure for gels. Most abundant protein bands (such as Rubisco) appear dark blue on a light blue background. Signal quantification was performed with ImageQuant (Molecular Dynamics).

**Database Searching of Peptides Identified by LC-MS/MS.** LC-MS/MS protein identification was performed at Chicago Biomedical Consortium and Stanford University. Proteins in gel bands were digested with trypsin, extracted, and peptides were identified on a Thermo LTQ after fractionation by using nano HPLC. MS/MS samples from immunoprecipitations from total extracts were searched against the IPI *Arabidopsis* database (v3.43) by using Mascot and SEQUEST search engines, and results were merged by using Scaffold. MS/MS Samples from immunoprecipitations from chloroplast extracts were analyzed by using Mascot, which was set up to search the NCBI nr\_080723 database (selected for *Arabidopsis thaliana*, unknown version, 51,937 entries).

**Antibodies.** Primary antibodies used were as follows: HA (Covance HA.11, monoclonal, 1:1,200); cyHsp70 (Stressgen SPA-817, monoclonal, 1:3,000 and SPA-757, rabbit polyclonal, 1:80,000, both specific for cytosolic Hsp70s; ref. 15); cpHsp70 [S78 from K. Keegstra (Michigan State University, East Lansing, MI; ref. 16), rabbit polyclonal, 1:3,000 for *Arabidopsis*, and from T. Leustek (Rutgers University, New Brunswick, NJ; ref. 17), guinea



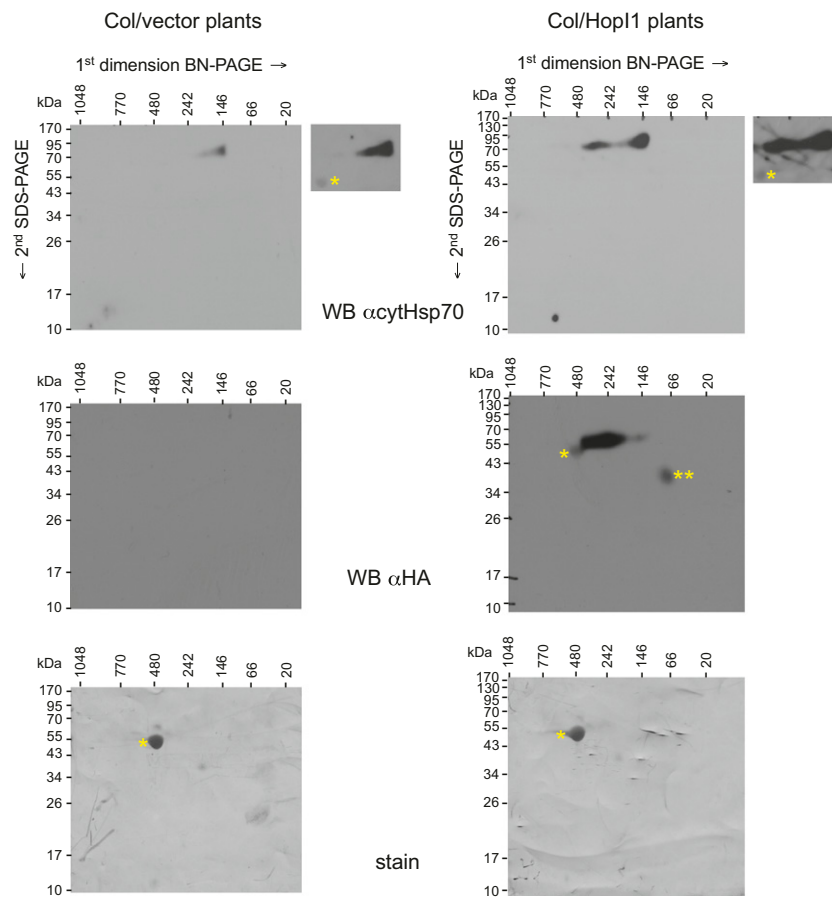

**Fig. S3.** Hop1-HA and cytHsp70 form similar-sized complexes in Hop1-expressing Arabidopsis. Proteins from Col/vector (*Left*) and Col/Hop1 (*Right*) plants were separated on 2D gels (first dimension, blue native gel; second dimension, SDS/PAGE) and the same membrane was probed with cytHsp70 antibody, HA antibody, and stained with Coomassie blue. Second dimension (SDS/PAGE) verified that signals in BN gel were from proteins of correct size (Hop1-HA and cytHsp70). Large cytHsp70 complexes were not detected in WT plants even with very long exposure (*Insets*). Same exposure is shown for Col/vector and Col/Hop1. \*Rubisco; \*\*Hop1 degradation product.

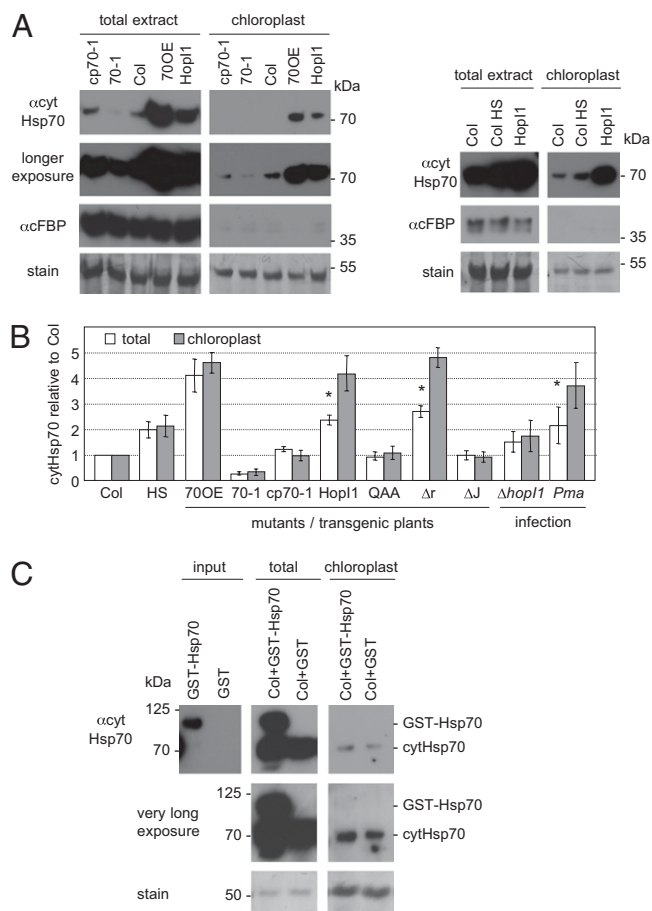

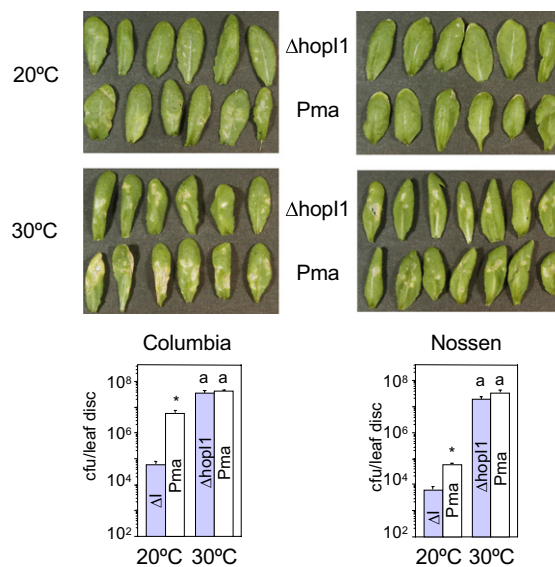

**Fig. S5.** Plants are more susceptible to infection at 30 °C. *HopI1* is not needed for *Pma* virulence at 30 °C. Disease symptoms 5 d after spray infection ( $OD_{600} = 0.01$ ) and bacterial growth 3 dpi are shown. Blue bars,  $\Delta hopI1$ ; white bars, wild-type *P. syringae* growth. At 20 °C,  $\Delta hopI1$  (blue bars) grew less than *Pma* (white bars;  $*P < 0.01$ ) in Col and Nossen Arabidopsis. At 30 °C, growth of both strains was the same and it was higher than at 20 °C ( $^bP < 0.01$ ) in Nossen (in both experiments) and sometimes in Columbia (in three of five experiments).

**Table S1. Hsp70 peptides identified by LC/MS/MS in three of the most abundant Hsp70 isoforms coimmunoprecipitated with HopI1-HA from Arabidopsis leaf and chloroplast-enriched extracts**

| Isoforms | Total leaf extract |                                |            | Chloroplast extract |                                |            |
|----------|--------------------|--------------------------------|------------|---------------------|--------------------------------|------------|
|          | Unique peptides*   | Specific peptides <sup>†</sup> | % coverage | Unique peptides*    | Specific peptides <sup>†</sup> | % coverage |
| Hsp70-1  | 19                 | 6                              | 32         | 30                  | 11                             | 44         |
| Hsp70-3  | 15                 | 6                              | 26         | 27                  | 10                             | 43         |
| Hsp70-4  | 11                 | 2                              | 22         | 19                  | 6                              | 28         |

One specific peptide each from Hsp70-2 and chloroplast cpHsp70-1 (Hsp70-6) was also identified.

\*Number of different peptides that match the isoform shown, but may also match one or more other isoforms.

<sup>†</sup>Peptides specific to one Hsp70 isoform.
